# Supplementary material for: Expert consensus on neurodevelopmental outcomes in pregnancy pharmacovigilance studies
Source: PubMed Central journal article supplement (PMC10270323; doi:10.3389/fphar.2023.1094698), 2023-06-01
Supplement: Table1.pdf [file Table1.pdf]

**Supplementary Table 1| Examples provided for the five identified themes.**

---

| <b>Theme</b>                            | <b>Subthemes</b>                                                                                                                                                                                                                                                                                                                         |
|-----------------------------------------|------------------------------------------------------------------------------------------------------------------------------------------------------------------------------------------------------------------------------------------------------------------------------------------------------------------------------------------|
| Importance and timing of investigations | <ul style="list-style-type: none"><li>• Are neurodevelopmental outcomes important enough to be considered central to pregnancy pharmacovigilance or collected routinely?</li><li>• Which products should neurodevelopmental outcomes be investigated for?</li><li>• What data should prompt neurodevelopmental investigations?</li></ul> |
| Core Outcomes                           | <ul style="list-style-type: none"><li>• What aspects of neurodevelopment are considered key/ core outcomes?</li></ul>                                                                                                                                                                                                                    |
| Optimal Methodology                     | <ul style="list-style-type: none"><li>• What is the optimal approach to investigation?</li><li>• What are the key confounder and medicator variables which should be considered?</li></ul>                                                                                                                                               |
| Age of Investigation                    | <ul style="list-style-type: none"><li>• What is the optimal time to assess neurodevelopmental outcomes?</li></ul>                                                                                                                                                                                                                        |
| When is Evidence Conclusive?            | <ul style="list-style-type: none"><li>• How should data be interpreted?</li><li>• When can conclusions be firmly drawn?</li></ul>                                                                                                                                                                                                        |

---
