# Supplementary material for: Expert consensus on neurodevelopmental outcomes in pregnancy pharmacovigilance studies
Source: PubMed Central journal article supplement (PMC10270323; doi:10.3389/fphar.2023.1094698), 2023-06-01
Supplement: Table2.pdf [file Table2.pdf]

**Supplementary Table 2 | Round 1 Questions to the NEWG**

| <b>Theme</b>                                                                                  | <b>Question</b>                                                                                                                                                                                                                                                                                                                                                                                                                                                                                                                                                                                                                                                                                                                                                                                                                                                                                                                                                                                                                                                                                                                                                                                                                                                                       |
|-----------------------------------------------------------------------------------------------|---------------------------------------------------------------------------------------------------------------------------------------------------------------------------------------------------------------------------------------------------------------------------------------------------------------------------------------------------------------------------------------------------------------------------------------------------------------------------------------------------------------------------------------------------------------------------------------------------------------------------------------------------------------------------------------------------------------------------------------------------------------------------------------------------------------------------------------------------------------------------------------------------------------------------------------------------------------------------------------------------------------------------------------------------------------------------------------------------------------------------------------------------------------------------------------------------------------------------------------------------------------------------------------|
| <b>At what point following approval should human neurodevelopmental outcomes be assessed?</b> | <ul style="list-style-type: none"> <li>• Should child neurodevelopment be investigated routinely for all medications following approval for use in humans?</li> <li>• Are there certain medication exposures which should be prioritised for neurodevelopmental investigation?</li> </ul>                                                                                                                                                                                                                                                                                                                                                                                                                                                                                                                                                                                                                                                                                                                                                                                                                                                                                                                                                                                             |
| <b>Barriers to neurodevelopmental outcome research</b>                                        | <ul style="list-style-type: none"> <li>• Are pre-clinical (animal) study results predictive of human neurodevelopmental outcomes</li> <li>• Are there any barriers to researching neurodevelopmental outcomes in children exposed in the womb?</li> </ul>                                                                                                                                                                                                                                                                                                                                                                                                                                                                                                                                                                                                                                                                                                                                                                                                                                                                                                                                                                                                                             |
| <b>Core Outcomes</b>                                                                          | <ul style="list-style-type: none"> <li>• Based on your informed professional opinion, which aspects of neurodevelopment can be altered by prenatal exposures (chemical, environmental or medicinal)?</li> <li>• Can a single score or single aspect of neurodevelopment be used to summarize neurodevelopmental functioning in all other areas?</li> <li>• What areas of neurodevelopment should be investigated before any conclusion can be made regarding risk or safety for a specific medication (e.g. by regulators, prescribers)?</li> <li>• What type(s) of investigations into neurodevelopment should be completed before conclusions can be made regarding either risk or safety for a specific medication?</li> </ul>                                                                                                                                                                                                                                                                                                                                                                                                                                                                                                                                                     |
| <b>Optimisation of Measurement</b>                                                            | <ul style="list-style-type: none"> <li>• What is the optimal way to measure neurodevelopment in a group of children exposed in utero?</li> <li>• At what age should the investigation of neurodevelopmental outcomes start?</li> <li>• At what age should the investigation of neurodevelopmental outcomes in exposed cohorts end?</li> <li>• At what age interval should longitudinal follow-up studies assess neurodevelopment?</li> <li>• Should the interval of assessment be different for exposures with early deviations in developmental trajectories versus those where development was similar to control children in infancy?</li> <li>• In your informed professional opinion, what variables are important to adjust for when investigating the impact of a given exposure?</li> <li>• In your informed professional opinion, what details about the exposure are important to record and consider?</li> <li>• We want to understand the optimal design features for the investigation of an exposure on child neurodevelopment. Please describe the ways that the methodology could be optimized in the following areas: Participant selection, Control/comparator, Exposure data, Measurement, Confounding optimization, Attrition, Other important design.</li> </ul> |
| <b>Interpretation</b>                                                                         | <ul style="list-style-type: none"> <li>• What is good practice in the interpretations and reporting of outcomes?</li> <li>• How do we best convey the results from measures (e.g. questionnaires, psychometrics) which score on a continuous measurement?</li> <li>• How would you best communicate mean differences in infant/child outcomes in a way that is meaningful?</li> </ul>                                                                                                                                                                                                                                                                                                                                                                                                                                                                                                                                                                                                                                                                                                                                                                                                                                                                                                 |
| <b>Other</b>                                                                                  | <ul style="list-style-type: none"> <li>• Is there any other topic in relation to neurodevelopmental outcomes which you would like to include in these discussions?</li> </ul>                                                                                                                                                                                                                                                                                                                                                                                                                                                                                                                                                                                                                                                                                                                                                                                                                                                                                                                                                                                                                                                                                                         |
